# Supplementary material for: The molecular make up of smoldering myeloma highlights the evolutionary pathways leading to multiple myeloma
Source: PubMed Central journal article supplement (PMC7804406; doi:10.1038/s41467-020-20524-2), 2021-01-12
Supplement: 41467_2020_20524_MOESM1_ESM.pdf [file 41467_2020_20524_MOESM1_ESM.pdf]

1 **Supplemental: The Molecular Make Up of Smoldering Myeloma Highlights the**  
2 **Evolutionary Pathways Leading to Multiple Myeloma**

3 **Supplementary Material**

4 Eileen M Boyle<sup>1,2,3</sup>, Shayu Deshpande<sup>1</sup>, Ruslana Tytarenko<sup>1</sup>, Cody Ashby<sup>1,4</sup>, Yan  
5 Wang<sup>1</sup>, Michael A Bauer<sup>1,4</sup>, Sarah K Johnson<sup>1</sup>, Christopher P Wardell<sup>1,4</sup>, Sharmilan  
6 Thanendrarajan<sup>1</sup>, Maurizio Zangari<sup>1</sup>, Thierry Facon<sup>5</sup>, Charles Dumontet<sup>2</sup>, Bart Barlogie<sup>6</sup>,  
7 Arnaldo Arbin<sup>3</sup>, Even H. Rustad<sup>3</sup>, Francesco Maura<sup>7</sup>, Ola Landgren<sup>7</sup>, Fenghuang  
8 Zhan<sup>1</sup>, Frits van Rhee<sup>1</sup>, Carolina Schinke<sup>1</sup>, Faith E Davies<sup>3</sup>, Gareth J Morgan<sup>3\*</sup>, Brian A  
9 Walker<sup>8\*</sup>

10

11 <sup>1</sup> Myeloma Center, University of Arkansas for Medical Sciences, Little Rock, AR, USA

12 <sup>2</sup> INSERM 1052/CNRS 5286 Cancer Research Center of Lyon, Lyon, FRANCE

13 <sup>3</sup> Perlmutter Cancer Center, NYU Langone Health, New York, NY, USA

14 <sup>4</sup> Department of Biomedical Informatics, University of Arkansas for Medical Sciences,  
15 Little Rock, AR, USA

16 <sup>5</sup> Service des maladies du sang. Hôpital Claude Huriez, Lille University Hospital, Lille,  
17 FRANCE.

18 <sup>6</sup> Division of Hematology, The Mount Sinai Hospital, New York, NY, USA

19 <sup>7</sup> Myeloma Service, Department of Medicine, Memorial Sloan Kettering Cancer Center, New  
20 York, NY, USA.

21 <sup>8</sup> Division of Hematology Oncology, Indiana University, Indianapolis, IN, USA.

22

23 \*These authors contributed equally.

24

25

26 **Supplemental Table 1: The incidence of copy number changes in SMM (n=82) and**  
 27 **MM (n=223) based on CN estimates from the targeted panel ( $\chi^2$ =chi-squared**  
 28 **statistic, two-sided p-value derived from Kruskal Wallis test).**

29

|                            | <b>MM</b> | <b>SMM</b> | <b><math>\chi^2</math></b> | <b>p-value</b> |
|----------------------------|-----------|------------|----------------------------|----------------|
| <b>gain(1q)</b>            | 33.63%    | 26.83%     | 0.9                        | 0.3            |
| <b>amp(1q)</b>             | 5.38%     | 4.88%      | 0.01                       | 0.9            |
| <b>del(11q)</b>            | 4.93%     | 3.66%      | 0.2                        | 0.6            |
| <b>Trisomy 11</b>          | 49.33%    | 40.24%     | 1.9                        | 0.1            |
| <b>del(1p):<br/>CDKN2C</b> | 17.04%    | 2.44%      | 11.2                       | 0.0008         |
| <b>Trisomy 9</b>           | 56.95%    | 46.34%     | 2.7                        | 0.12           |
| <b>del(16q): CYLD</b>      | 26.01%    | 12.20%     | 5.8                        | 0.01           |
| <b>del(2p)</b>             | 2.44%     | 4.48%      | 0.05                       | 0.8            |
| <b>del(1p):<br/>FAM46C</b> | 22.87%    | 8.54%      | 7.8                        | 0.008          |
| <b>Trisomy 6</b>           | 21.52%    | 18.29%     | 0.2                        | 0.6            |
| <b>del(16q): MAF</b>       | 28.25%    | 13.41%     | 6.3                        | 0.01           |
| <b>del(6q)</b>             | 15.70%    | 13.41%     | 0.06                       | 0.2            |
| <b>del(13q)</b>            | 48.43%    | 41.46%     | 0.9                        | 0.3            |
| <b>del(17p)</b>            | 15.70%    | 6.10%      | 4                          | 0.04           |
| <b>del(14q)</b>            | 19.28%    | 7.32%      | 5.5                        | 0.02           |

30

31

32 **Supplemental Table 2: Summary of sample sequencing metrics (n=number of**  
33 **patients).**

|                    | <b>Translocation panel Depth</b> | <b>Mutation panel Depth</b> |
|--------------------|----------------------------------|-----------------------------|
| <b>SMM (n=82)</b>  | 363 (332-394)                    | 786 (692-867)               |
| <b>EM (n=10)</b>   | 357 (321-406)                    | 735 (731-891)               |
| <b>MGUS (n=17)</b> | 413 (340-433)                    | 974 (834-1036)              |

34

35

36 **Supplemental Table 3: List of genes on the targeted panel.** In bold are the  
 37 previously described mutational driver genes.  
 38

|                        |                      |                        |                     |                      |
|------------------------|----------------------|------------------------|---------------------|----------------------|
| <i>ARID1A</i>          | <b><i>CHD2</i></b>   | <b><i>FBXW7</i></b>    | <i>KRAS</i>         | <b><i>PSMG2</i></b>  |
| <b><i>ARHGEF12</i></b> | <i>CHD4</i>          | <i>FCHSD2</i>          | <i>LRP1B</i>        | <b><i>PTPN11</i></b> |
| <i>ARID2</i>           | <i>CHEK1</i>         | <b><i>FGFR3</i></b>    | <i>LRRK2</i>        | <i>RAD50</i>         |
| <b><i>ASXL1</i></b>    | <i>CHEK2</i>         | <i>HDAC1</i>           | <b><i>LTB</i></b>   | <b><i>RB1</i></b>    |
| <i>ATM</i>             | <i>CRBN</i>          | <i>HDAC4</i>           | <b><i>MAF</i></b>   | <i>RBX1</i>          |
| <b><i>ATR</i></b>      | <b><i>CREBBP</i></b> | <i>HDAC7</i>           | <b><i>MAFB</i></b>  | <b><i>SETD2</i></b>  |
| <i>ATRX</i>            | <i>CUL4A</i>         | <i>HIST1H1C</i>        | <i>MAP3K14</i>      | <b><i>SF3B1</i></b>  |
| <b><i>BCL10</i></b>    | <i>CUL4B</i>         | <i>HIST1H1D</i>        | <b><i>MAX</i></b>   | <i>SMARCA4</i>       |
| <b><i>BCL6</i></b>     | <i>CXCR4</i>         | <b><i>HIST1H1E</i></b> | <i>MKI67</i>        | <i>STAT3</i>         |
| <b><i>BCL7A</i></b>    | <b><i>CYLD</i></b>   | <b><i>IDH1</i></b>     | <i>MLL</i>          | <i>TAF1</i>          |
| <b><i>BCORL1</i></b>   | <i>DDB1</i>          | <b><i>IDH2</i></b>     | <i>MYC</i>          | <i>TET1</i>          |
| <b><i>BIRC2</i></b>    | <b><i>DIS3</i></b>   | <i>IKZF1</i>           | <i>MYD88</i>        | <b><i>TET2</i></b>   |
| <b><i>BIRC3</i></b>    | <b><i>DNMT3A</i></b> | <i>IKZF3</i>           | <i>NCKAP5</i>       | <i>TET3</i>          |
| <i>BRAF</i>            | <i>DOT1L</i>         | <i>IKZF4</i>           | <b><i>NCOR1</i></b> | <b><i>TP53</i></b>   |
| <b><i>BRCA1</i></b>    | <i>EGFR</i>          | <b><i>IRF4</i></b>     | <i>NEDD9</i>        | <b><i>TRAF2</i></b>  |
| <b><i>BRCA2</i></b>    | <b><i>EGR1</i></b>   | <i>JAK1</i>            | <b><i>NF1</i></b>   | <b><i>TRAF3</i></b>  |
| <b><i>BRD4</i></b>     | <b><i>EP300</i></b>  | <i>JAK2</i>            | <i>NOTCH1</i>       | <i>U2AF1</i>         |
| <b><i>BRF1</i></b>     | <i>EZH1</i>          | <i>JAK3</i>            | <i>NOTCH4</i>       | <i>VSIG6</i>         |
| <b><i>CARD11</i></b>   | <i>EZH2</i>          | <i>KAT6A</i>           | <i>NR3C1</i>        | <i>WHSC1</i>         |
| <i>CCND1</i>           | <i>FAF1</i>          | <i>KDM2B</i>           | <b><i>NRAS</i></b>  | <i>WHSC1L1</i>       |
| <b><i>CCND3</i></b>    | <b><i>FAM46C</i></b> | <i>KDM5A</i>           | <i>PCLO</i>         | <b><i>XBP1</i></b>   |
| <b><i>CD36</i></b>     | <i>FANCA</i>         | <b><i>KDM6A</i></b>    | <i>POT1</i>         | <i>ZFHX4</i>         |
| <i>CDKN1B</i>          | <i>FANCD2</i>        | <b><i>KMT2B</i></b>    | <b><i>PRDM1</i></b> | <i>ZRSR2</i>         |
| <i>CDKN2C</i>          | <i>FANCI</i>         | <b><i>KMT2C</i></b>    | <b><i>PRKD2</i></b> |                      |
| <b><i>CHD1</i></b>     | <i>FANCM</i>         | <i>KMT2D</i>           | <i>PSMB5</i>        |                      |

39

40

41

42

43 **Supplemental Table 4: Metrics of sequential samples.**

| Name | Median depth | Purity by flow | PYCLONE |
|------|--------------|----------------|---------|
| A_2  | 99           | 74             | Yes     |
| A_3  | 88           | 70             | Yes     |
| A_4  | 89           | 90.4           | Yes     |
| A_5  | 86           | 83.4           | Yes     |
| A_6  | 103          | 91.26          | Yes     |
| B_2  | 85           | 94             | Yes     |
| B_3  | 110          | 98             | Yes     |
| B_6  | 116          | 67             | Yes     |
| B_7  | 103          | 87.1           | Yes     |
| B_8  | 106          | 64             | Yes     |
| C_1  | 90           | 97.9           | Yes     |
| C_2  | 93           | 94.7           | Yes     |
| C_4  | 105          | 89             | Yes     |
| C_5  | 89           | 85             | Yes     |
| C_6  | 92           | 80             | Yes     |
| C_7  | 90           | 60             | Yes     |
| C_8  | 100          | 80.2           | Yes     |
| D_3  | 126          | 86             | Yes     |
| D_4  | 154          | 89             | Yes     |
| D_5  | 128          | 96             | Yes     |
| D_6  | 100          | 100            | Yes     |
| D_7  | 98           | 97             | Yes     |
| E_10 | 80           | 99.6           | Yes     |
| E_2  | 151          | 85.3           | Yes     |
| E_3  | 98           | 84             | Yes     |
| E_4  | 108          | 91             | Yes     |
| E_5  | 123          | 87.9           | Yes     |
| E_6  | 115          | 94.3           | Yes     |
| E_7  | 103          | 87             | Yes     |
| E_8  | 91           | 87.6           | Yes     |
| E_9  | 90           | 98.7           | Yes     |
| F_2  | 112          | 85.9           | Yes     |
| F_3  | 90           | 87.4           | Yes     |
| F_4  | 77           | 90             | Yes     |
| F_5  | 96           | 89             | Yes     |
| F_6  | 91           | 68             | Yes     |
| F_7  | 104          | 100            | Yes     |
| F_8  | 91           | 94.2           | Yes     |
| G_1  | 81           | 91             | Yes     |
| G_2  | 99           | 92             | Yes     |
| H_1  | 99           | 60             | No      |
| H_10 | 68           | 98             | No      |
| H_2  | 70           | 80             | No      |
| H_5  | 81           | 90             | No      |
| H_6  | 81           | 97.5           | No      |
| H_8  | 76           | 99.1           | No      |
| H_9  | 68           | 98.5           | No      |
| I_1  | 78           | 96             | Yes     |
| I_4  | 106          | 87.6           | Yes     |
| I_5  | 85           | 92             | No      |
| I_6  | 89           | 95             | No      |
| I_8  | 108          | 99.5           | Yes     |
| I_9  | 84           | 99.4           | Yes     |

44

45 **Supplemental Table 5. ddPCR primer and probe sequences.**  
 46

|                       | <i>IGHG3-MYC (5'-3')</i>                                         | non-translocated <i>IGH</i> locus (5'-3')                          |
|-----------------------|------------------------------------------------------------------|--------------------------------------------------------------------|
| <b>Forward primer</b> | CAGTATTTTAGTAGCTCAAAGACACCTCTT                                   | AGCTGCCACCTGCTTGT                                                  |
| <b>Reverse primer</b> | GCTTAGGTCAGTTTTGCCCATCT                                          | CTGGGCTGGGCTGAGTT                                                  |
| <b>Probes</b>         | FAM-TCCATTTCTGAAGACTTA-MGBNFQ<br>VIC-AGTCCATTTCTGATGACTTA-MGBNFQ | FAM- TCCATTTCTGAAGACTTA-MGBNFQ<br>VIC- AGTCCATTTCTGATGACTTA-MGBNFQ |

47

|        | Genes/Loci | Chr    | Genes/Loci | Chr    | Genes/Loci | Chr    | Genes/Loci | Chr    | Genes/Loci | Chr   | Genes/Loci |       |    |      |    |      |
|--------|------------|--------|------------|--------|------------|--------|------------|--------|------------|-------|------------|-------|----|------|----|------|
| 1      | 1pTEL      | 5      | 5q12       | 8      | WHSC1L1    | 11     | 11qCEN     | 14     | PSMB5      | 19    | DOT1L      |       |    |      |    |      |
|        | ARID1A     |        | CHD1       |        | 8pCEN      |        | DDB1       |        | FANCM      |       | SMARCA4    |       |    |      |    |      |
|        | HDAC1      |        | RAD50      |        | KAT6A      |        | CCND1      |        | MAX        |       | BRD4       |       |    |      |    |      |
|        | FAF1       |        | EGR1       |        | ZFHX4      |        | FCHSD2     |        | TRAF3      |       | JAK3       |       |    |      |    |      |
|        | CDKN2C     |        | NR3C1      |        | NSMCE2     |        | BIRC3      |        | BRF1       |       | 19pCEN     |       |    |      |    |      |
|        | JAK1       |        | 5q32       |        | TRIB1      |        | BIRC2      |        | VSIG6      |       | KMT2B      |       |    |      |    |      |
|        | BCL10      | 6      | IRF4       |        | LINC00861  |        | ATM        | 15qCEN | PRKD2      |       |            |       |    |      |    |      |
|        | NRAS       |        | NEDD9      |        | FAM84B     |        | MLL        | FANCI  | 19qTEL     |       |            |       |    |      |    |      |
|        | 1pCEN      |        | HIST1H1C   |        | PCAT1      |        | ARHGEF12   | IDH2   | 20         |       | ASXL1      |       |    |      |    |      |
|        | FAM46C     |        | HIST1H1E   |        | POU5F1B    |        | CHEK1      | CHD2   | MAFB       |       |            |       |    |      |    |      |
|        | 1q21.3     |        | HIST1H1D   |        | LOC727677  |        | 11qTEL     | 16     | CREBBP     |       | 21         | U2AF1 |    |      |    |      |
|        | 1qTEL      |        | LTB        |        | MYC        |        | KDM5A      |        | 16qCEN     |       | 22         | CHEK2 |    |      |    |      |
|        | 2          |        | DNMT3A     |        | 7          |        | NOTCH4     | 9      | PVT1       |       | 12         | CD27  | 17 | CYLD | 23 | XBP1 |
|        |            |        | ALK19      |        |            |        | CCND3      |        | LOC728724  |       |            | CHD4  |    | MAF  |    | RBX1 |
| TET3   |            | 6qCEN  | GSDMC      | CDKN1B |            | 16qTEL | EP300      |        |            |       |            |       |    |      |    |      |
| NCKAP5 |            | PRDM1  | 8qCEN      | KRAS   |            | FANCA  | ZRSR2      |        |            |       |            |       |    |      |    |      |
| CXCR4  |            | PARK2  | 9pTEL      | 12pCEN |            | 17pTEL | KDM6A      |        |            |       |            |       |    |      |    |      |
| LRP1B  |            | CARD11 | JAK2       | LRRK2  |            | TP53CN | TAF1       |        |            |       |            |       |    |      |    |      |
| SF3B1  |            | IKZF1  | CDKN2A     | ARID2  |            | TP53   | ATRX       |        |            |       |            |       |    |      |    |      |
| IDH1   |            | EGFR   | CDKN2B     | HDAC7  |            | NCOR1  | CUL4B      |        |            |       |            |       |    |      |    |      |
| HDAC4  |            | 7pCEN  | 9pCEN      | KMT2D  |            | 17pCEN | BCORL1     |        |            |       |            |       |    |      |    |      |
| 3      |            | CRBN   | 7          | 7qCEN  |            | 10     | NOTCH1     |        | 13         | IKZF4 |            | 18    |    | NF1  |    | 18   |
|        | FANCD2     | CD36   |            | TRAF2  | PTPN11     |        | IKZF3      |        |            |       |            |       |    |      |    |      |
|        | MYD88      | PCLO   |            | TET1   | KDM2B      |        | STAT3      |        |            |       |            |       |    |      |    |      |
|        | SETD2      | POT1   |            | MKI67  | BCL7A      |        | EZH1       |        |            |       |            |       |    |      |    |      |
|        | 3p         | BRAF   |            |        | 13qCEN     |        | BRCA1      |        |            |       |            |       |    |      |    |      |
|        | 3q         | EZH2   |            |        | BRCA2      |        | MAP3K14    |        |            |       |            |       |    |      |    |      |
|        | ATR        | KMT2C  |            |        | RB1        |        | PSMG2      |        |            |       |            |       |    |      |    |      |
|        | BCL6       |        |            |        | DIS3       |        |            |        |            |       |            |       |    |      |    |      |
|        | 4          | FGFR3  |            |        |            |        |            | 13qTEL |            |       |            |       |    |      |    |      |
|        |            | WHSC1  |            |        |            |        |            | CUL4A  |            |       |            |       |    |      |    |      |
| TET2   |            |        |            |        |            |        |            |        |            |       |            |       |    |      |    |      |
| FBXW7  |            |        |            |        |            |        |            |        |            |       |            |       |    |      |    |      |

48 Supplemental Table 6: List of loci included in the plot comparing SMM and MM copy number changes (Figure 1c)

49 **Supplemental Figure 1: The number of mutations per sample identified on the**  
50 **targeted panel is lower in SMM than in MM.** The Kruskal-Wallis test results at the top  
51 represents the overall test n=number of patients, two-sided p-value derived from  
52 Kruskal Wallis test. Boxplot representing second quartile, median, and third quartile,  
53 whiskers representing first and fourth quartile.  
54

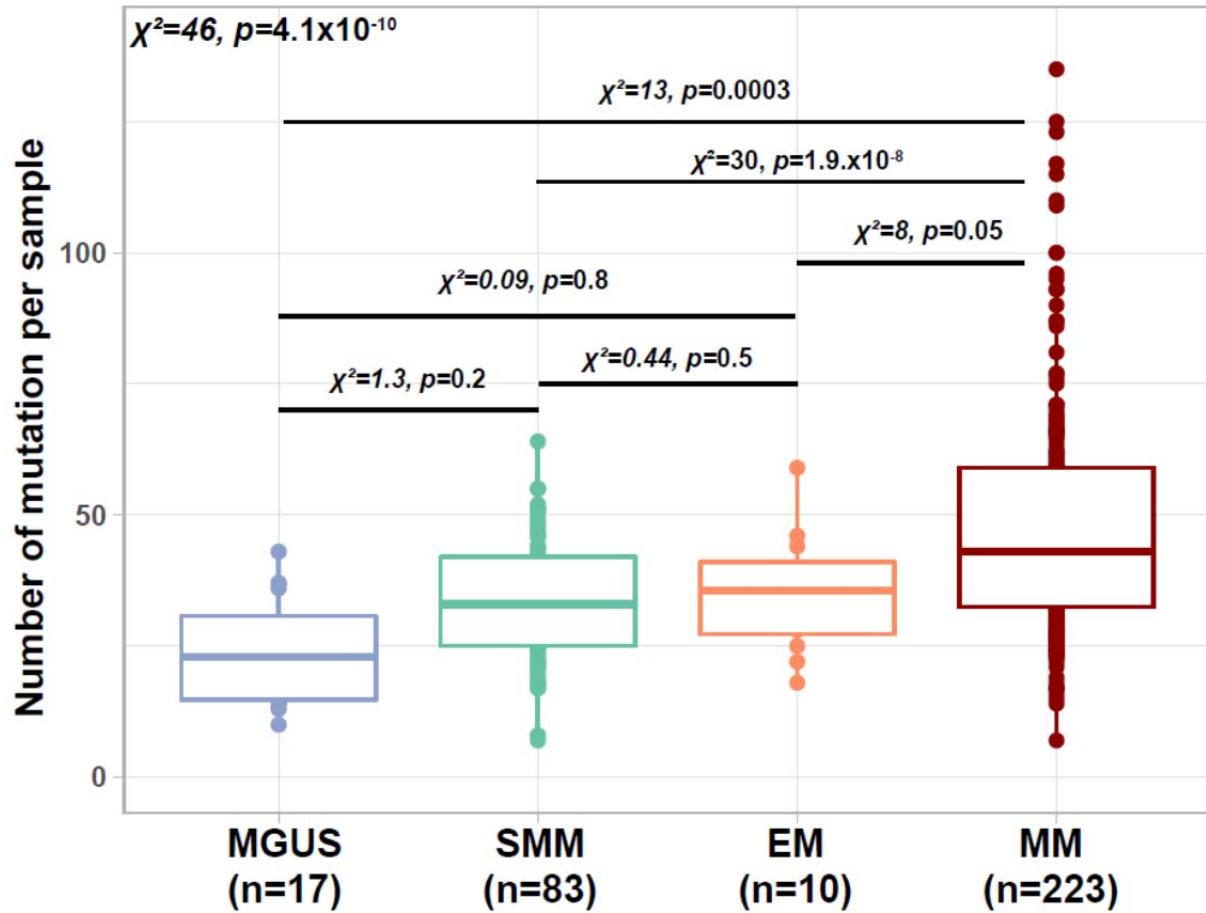

55

56



57 **Supplemental Figure 2: Driver mutations increase with disease stages from**  
58 **MGUS to MM (MM=223, EM=10, SMM=82, and MGUS=17).**

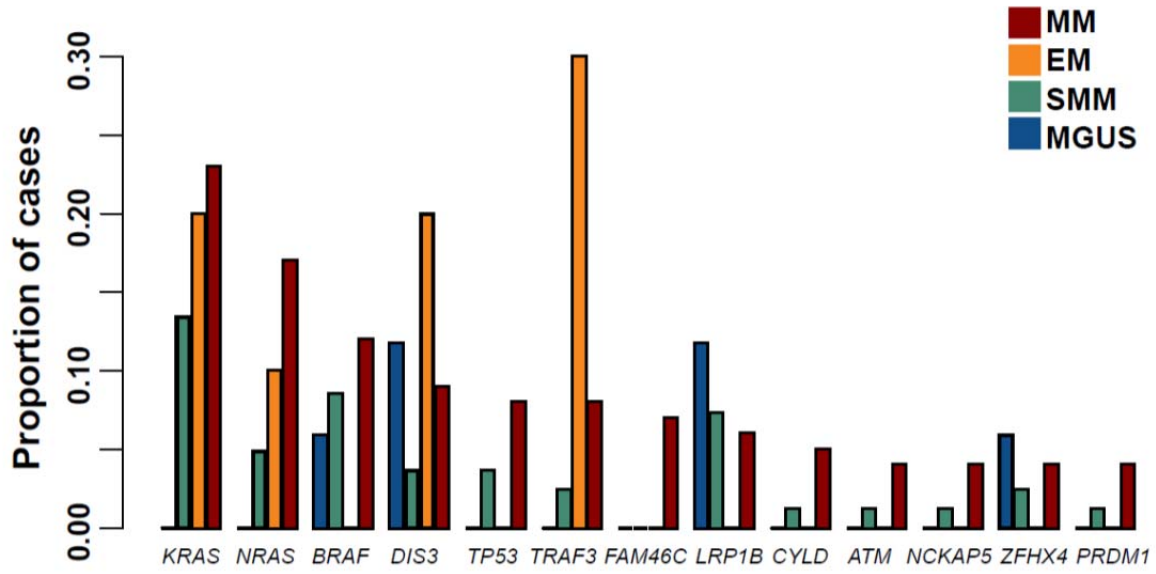

59

60

61 **Supplemental Figure 3: Signature analysis** a. Dendrogram representing the  
62 signatures present showing clustering of maf subgroup MM samples. b. There was a  
63 trend suggesting SMM patients with >5% APOBEC progressed faster than the others

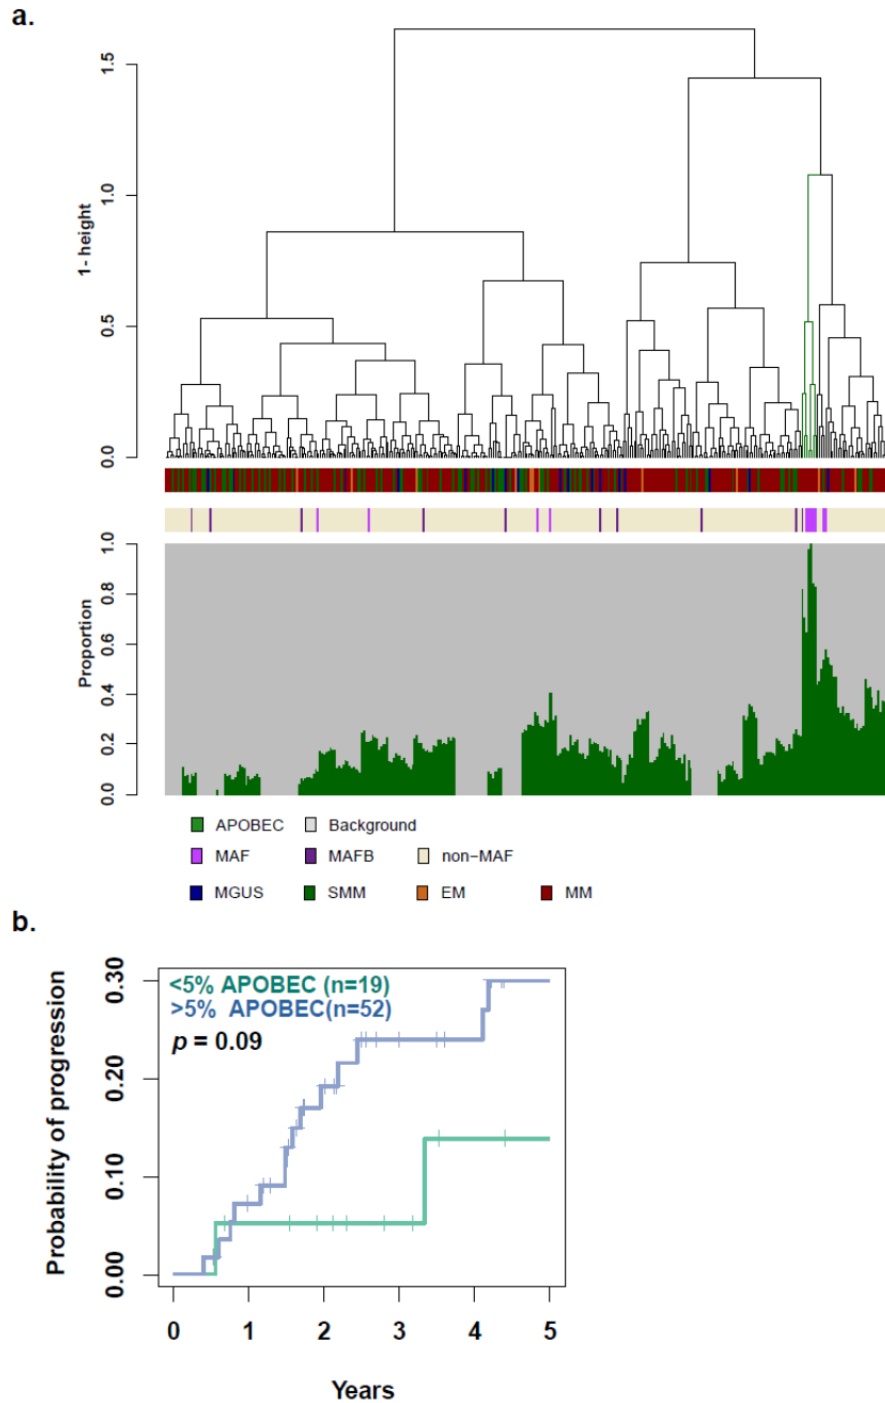

64

65

66 **Supplemental Figure 4: Distribution of mutations per sample and risk group**  
 67 **(IMWG).**

68

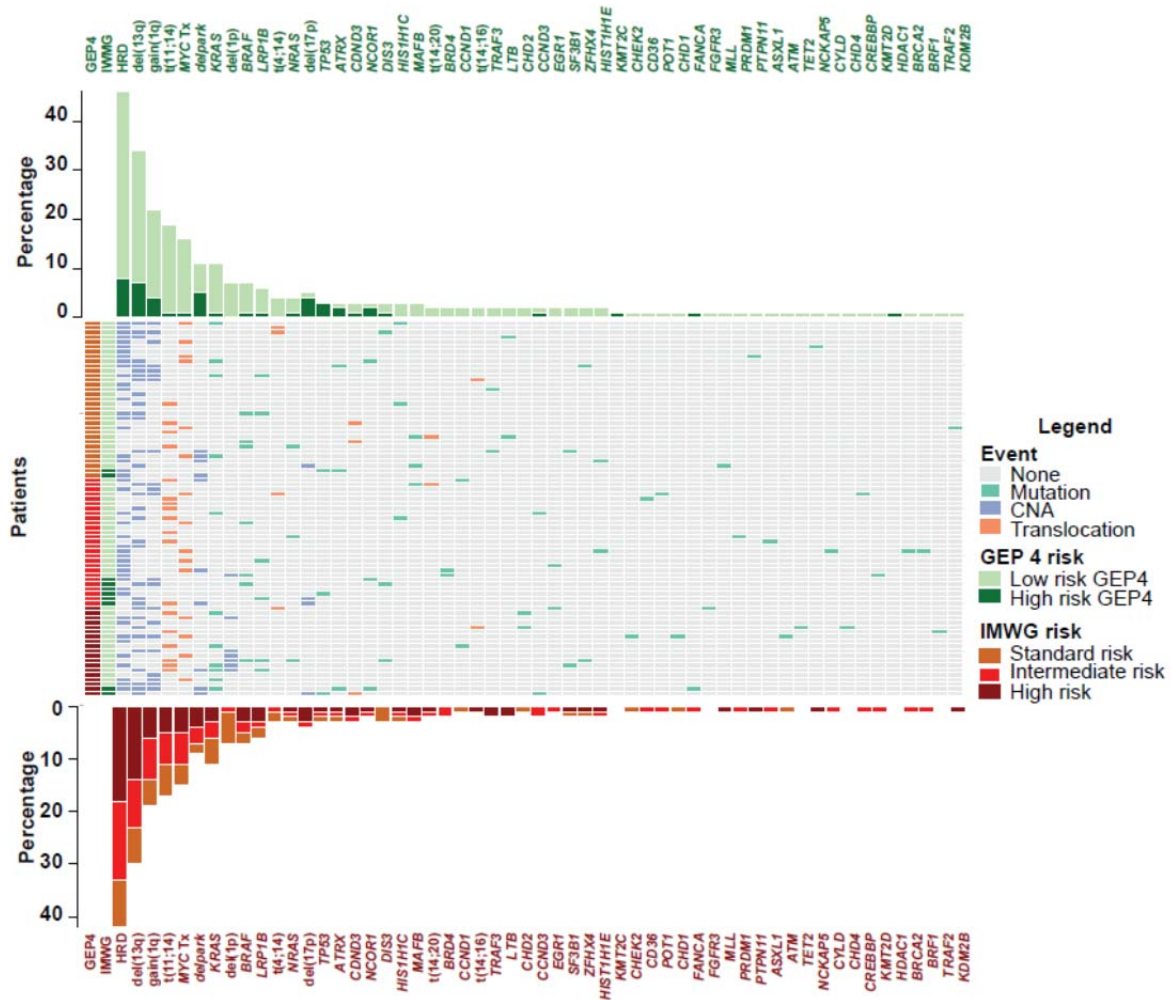

69

70

71 **Supplemental Figure 5: Impact on progression free survival** of a. del(6q) b. IMWG  
 72 subgroups. c. GEP4 risk score. d. RAS (*BRAF/NRAS/KRAS*) mutations combined  
 73 Multivariate analysis performed using all factors with an event present in n≥7 (IMWG,  
 74 GEP4, del(6q), del(13q), mut/del *TP53*, and *KRAS* mutations). n=number of patients  
 75 with the mutation and N=total number of patients evaluated, error-bars=95% CI, p=  
 76 logrank test.

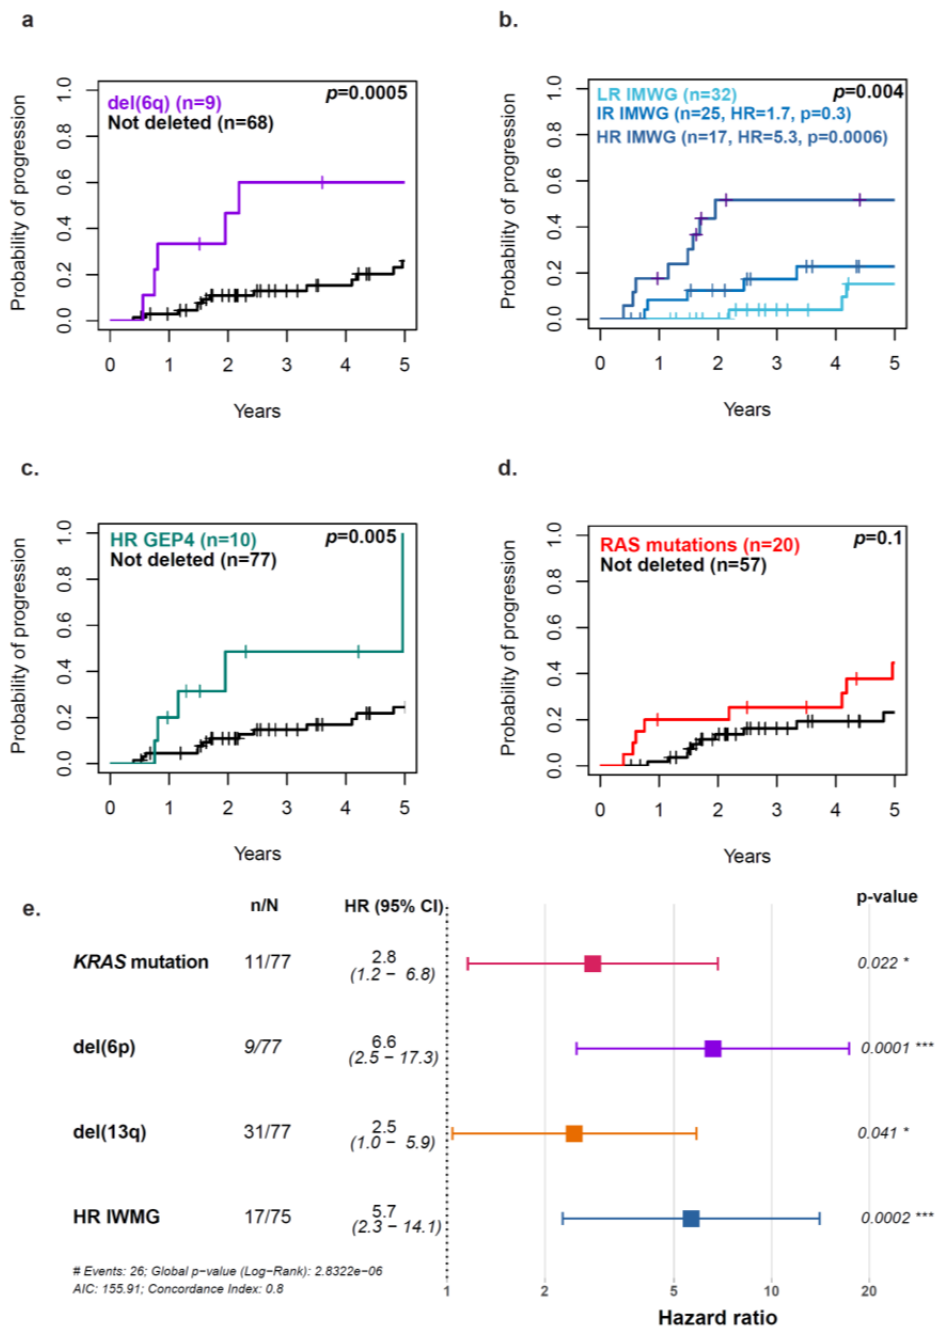

78 **Supplemental Figure 6: Analysis of the patients that were within 3 months from**  
79 **initial diagnosis** suggesting a. *KRAS* mutations have a stronger impact on progression  
80 among the ND SMM patients. b. GEP4, *KRAS* mutations, and HR mutations segregate  
81 patients effectively  $p = \text{logrank test}$ .

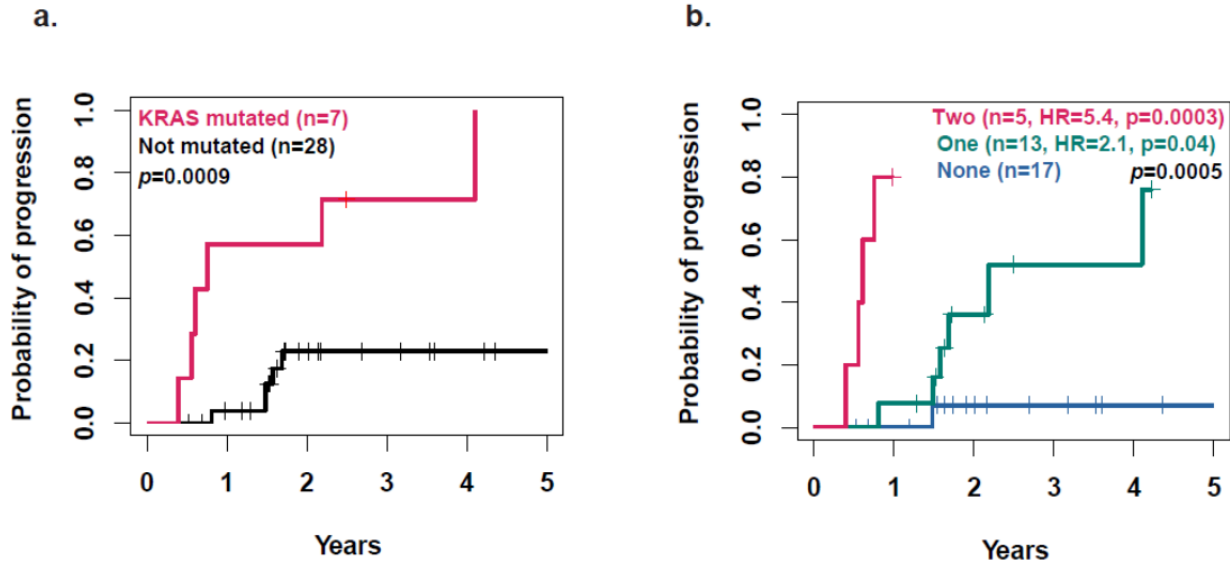

82

83

84 **Supplemental Figure 7: NF-κB score in SMM is similar to MM and not MGUS.** The  
 85 Kruskal-Wallis test results at the bottom represents the overall test. n=number of  
 86 patients, two-sided *p*-value derived from Kruskal Wallis test.  
 87

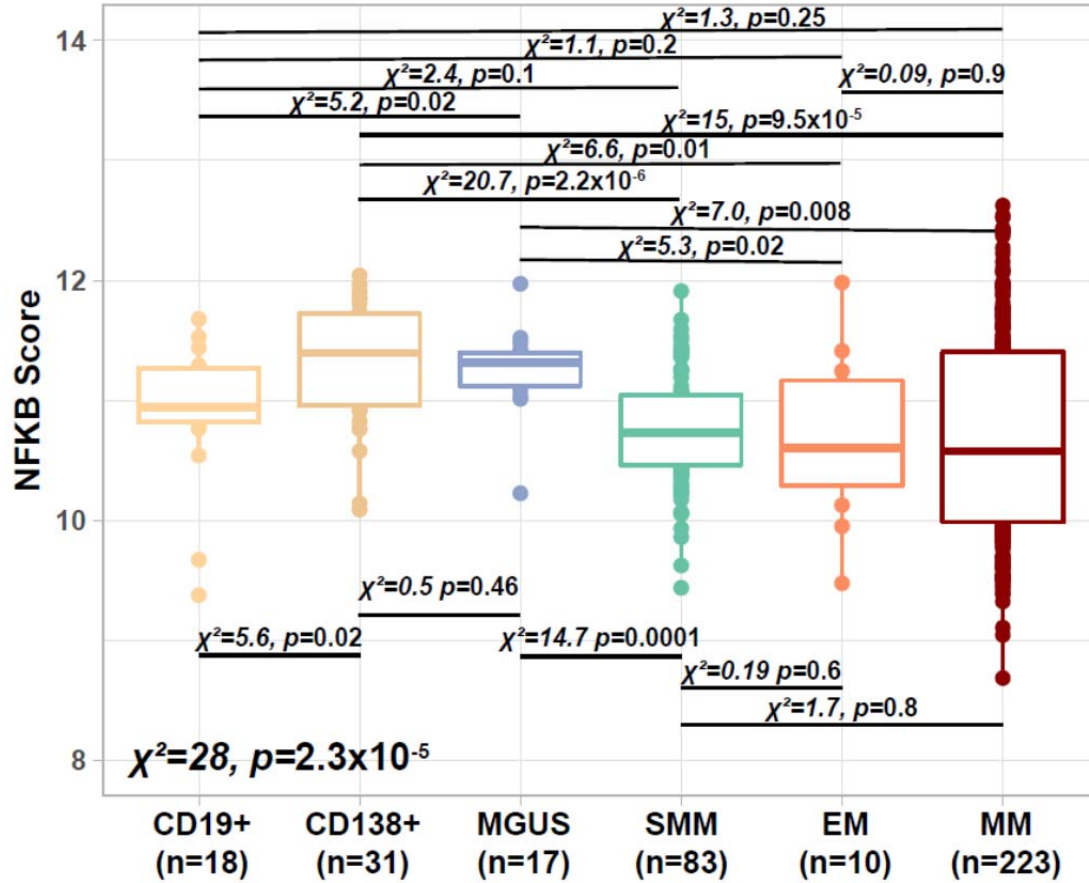

88  
 89  
 90

91 **Supplemental Figure 8: Evolution of CNA events in sequential sample.** Highlighted  
 92 in green and red are the changing losses and gains, respectively.  
 93

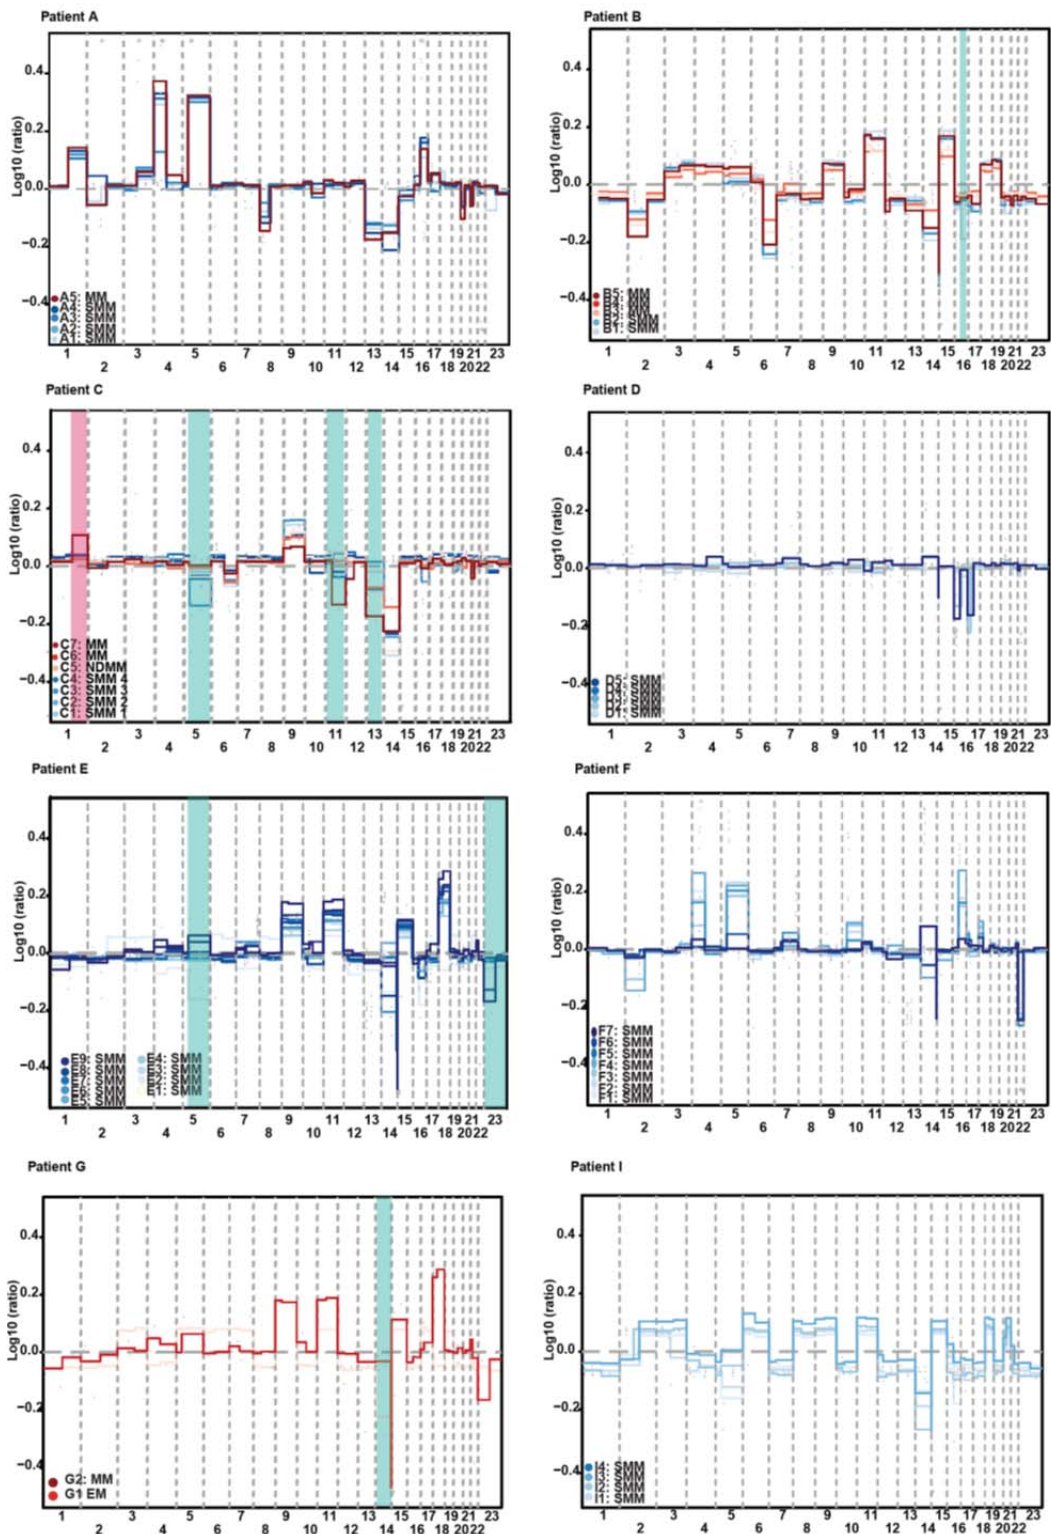

94

95 **Supplemental Figure 9: Subgroup analysis of number of mutations per sample**  
 96 **over time.** a. Mutation rate over time in HRD vs nHRD. b. Mutation rate in progressors  
 97 vs non progressors. c. Number of mutations per sample between SMM and MM. d.  
 98 Number of drivers per sample between SMM and MM.  $\chi^2$ =chi-statistic,  $r^2$ =coefficient of  
 99 determination, Error bands=95%CI,  $p$ =one-way ANOVA (a-b) two-sided p-value derived  
 100 from Kruskal-Wallis test (c-d),  $n$ =number of samples. Boxplot representing second  
 101 quartile, median, and third quartile, whiskers representing first and last quartile.  
 102

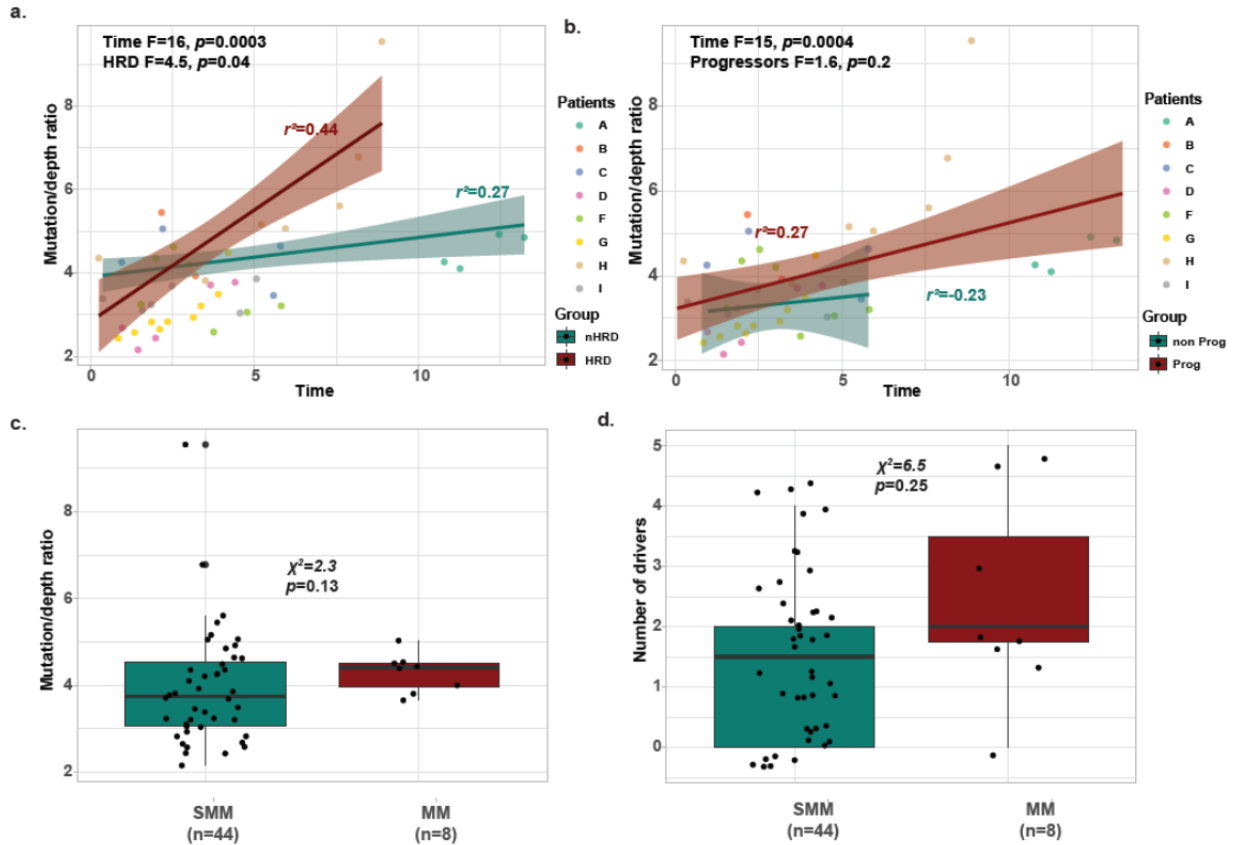

103

104



105 **Supplemental Figure 10: Genomic evolution of Patient C.** a. CCF plot showing the  
 106 emergence of an *NF1* clone. b. Fishplot summarizing the clonal evolution in parallel to  
 107 the paraprotein evolution. c. Phylogeny tree showing branching evolution.

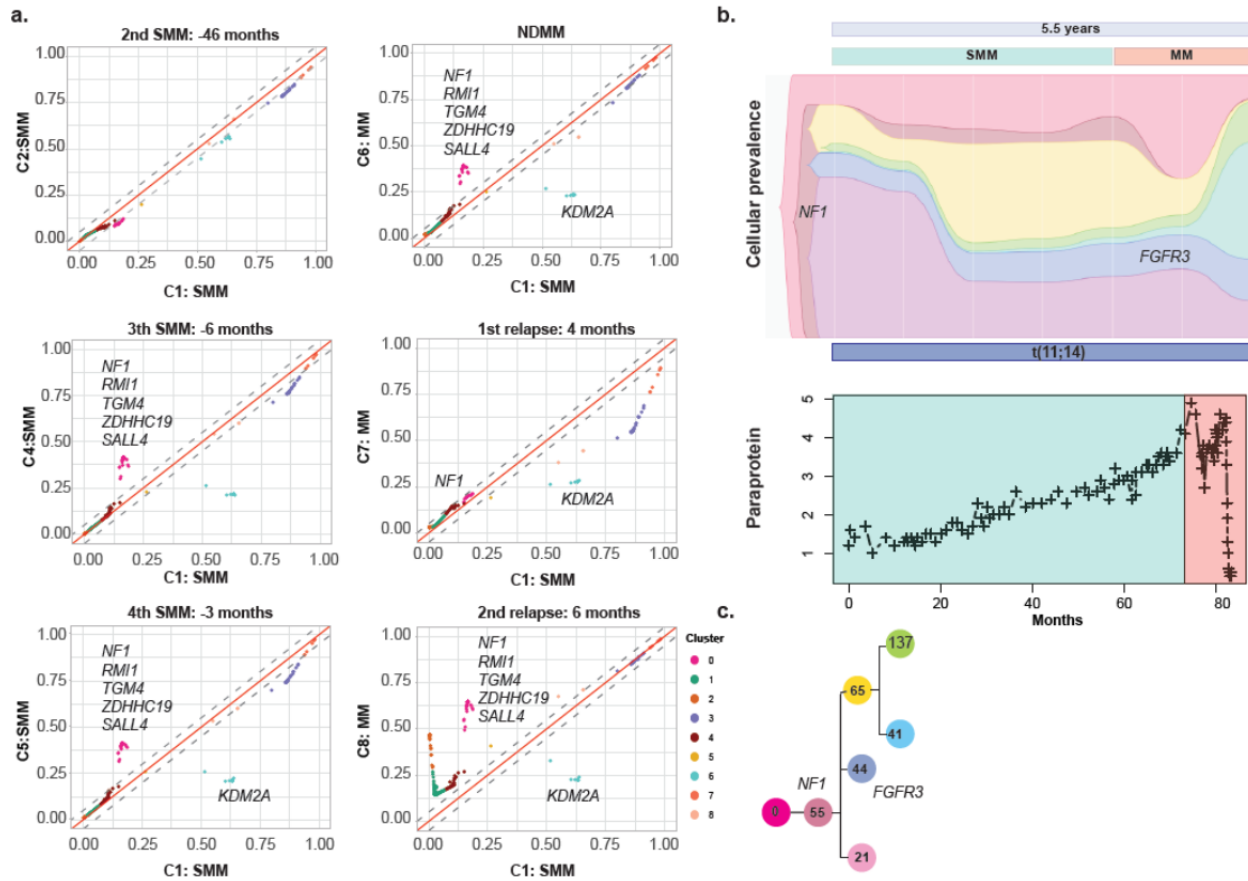

108  
 109  
 110  
 111  
 112  
 113  
 114  
 115  
 116

117 **Supplemental Figure 11: Genomic evolution of Patient D.** a. CCF plot showing the  
 118 absence of clonal selection in a patient that has yet to progress. b. Fishplot  
 119 summarizing the clonal evolution in parallel to the paraprotein evolution. c. Phylogeny  
 120 tree showing branching evolution.  
 121

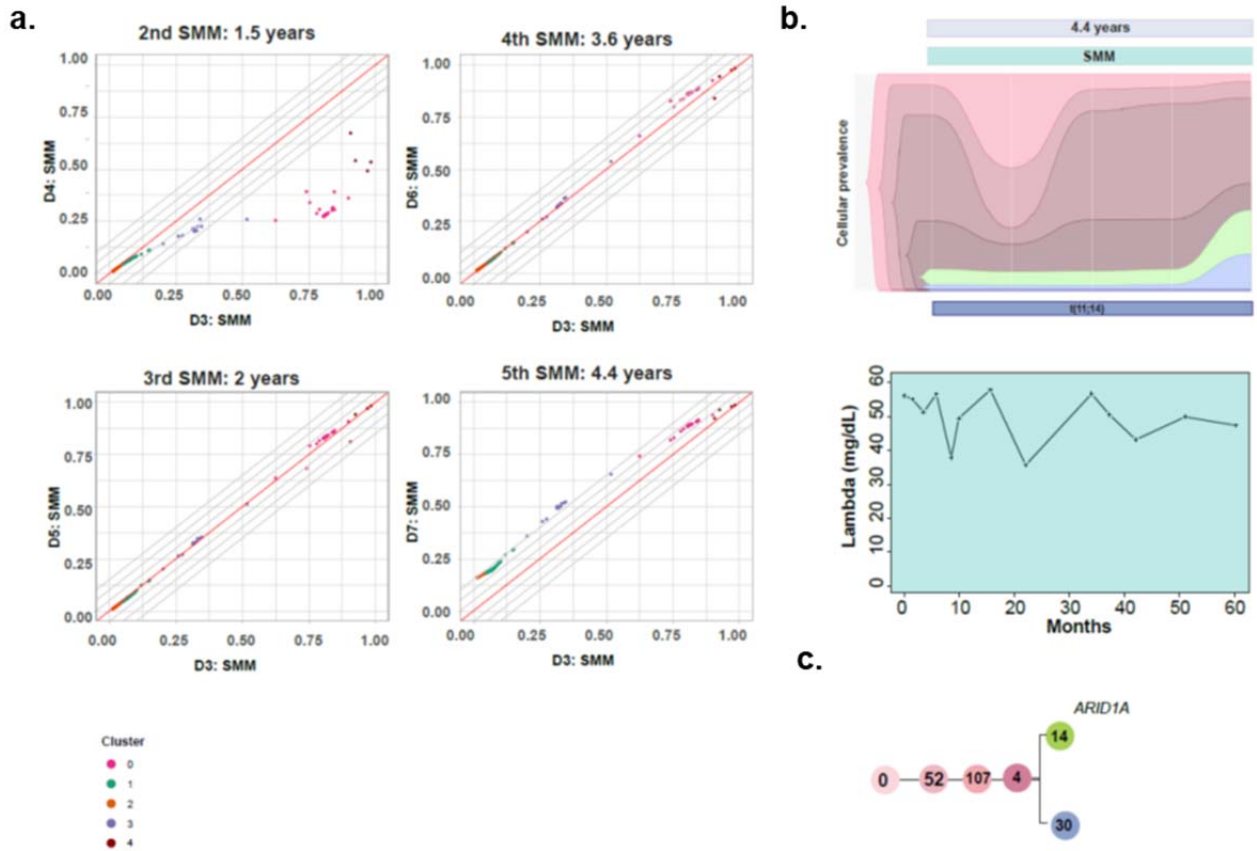

122  
 123  
 124  
 125

126 **Supplemental Figure 12: Genomic evolution of Patient E.** a. CCF plot showing the  
 127 emergence of a *KRAS* and *MAPK6* clone. b. Fishplot summarizing the clonal evolution  
 128 in parallel to the paraprotein evolution. c. Phylogeny tree showing branching evolution.  
 129

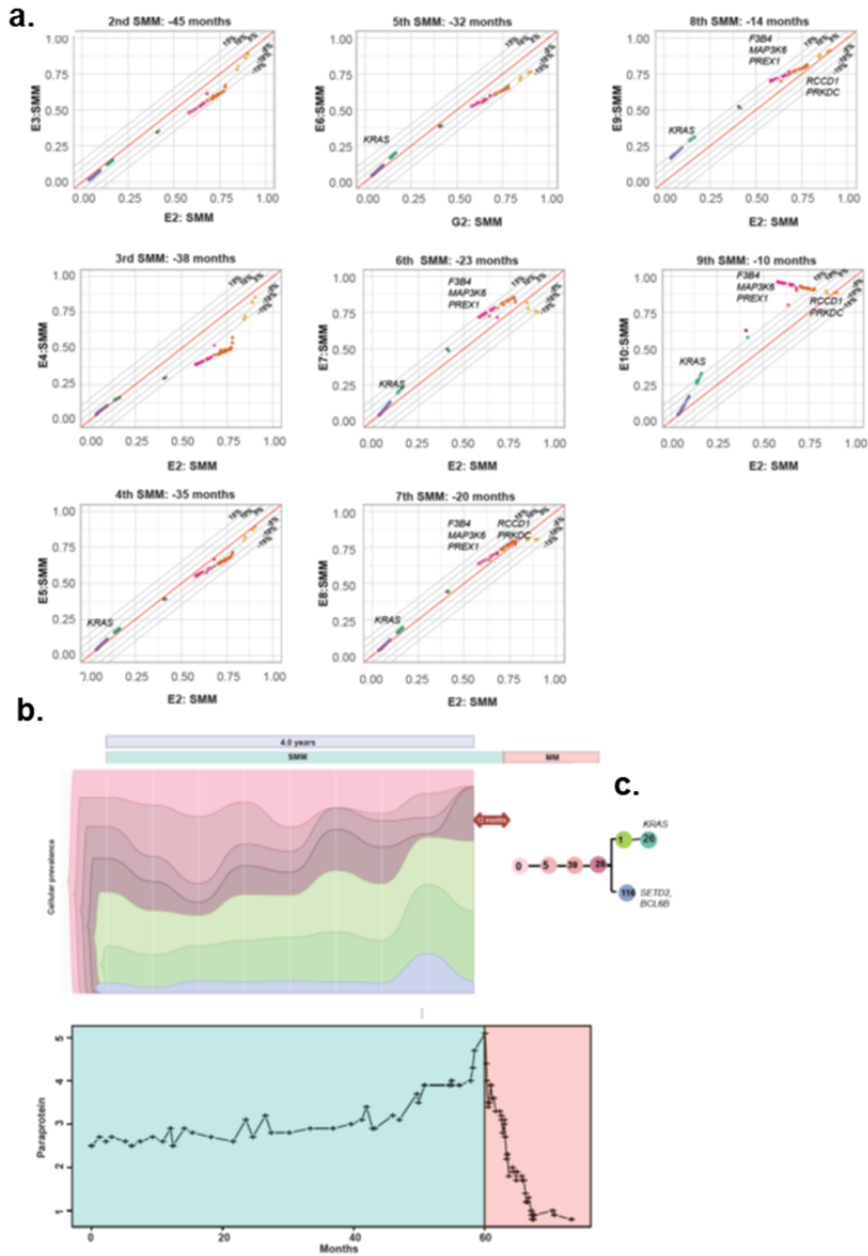

130

131

132 **Supplemental Figure 13: Genomic evolution of Patient F.** a. CCF plot showing  
 133 stable clonal composition. b. Fishplot summarizing the clonal evolution in parallel to the  
 134 paraprotein evolution. c. Phylogeny tree showing branching evolution.  
 135

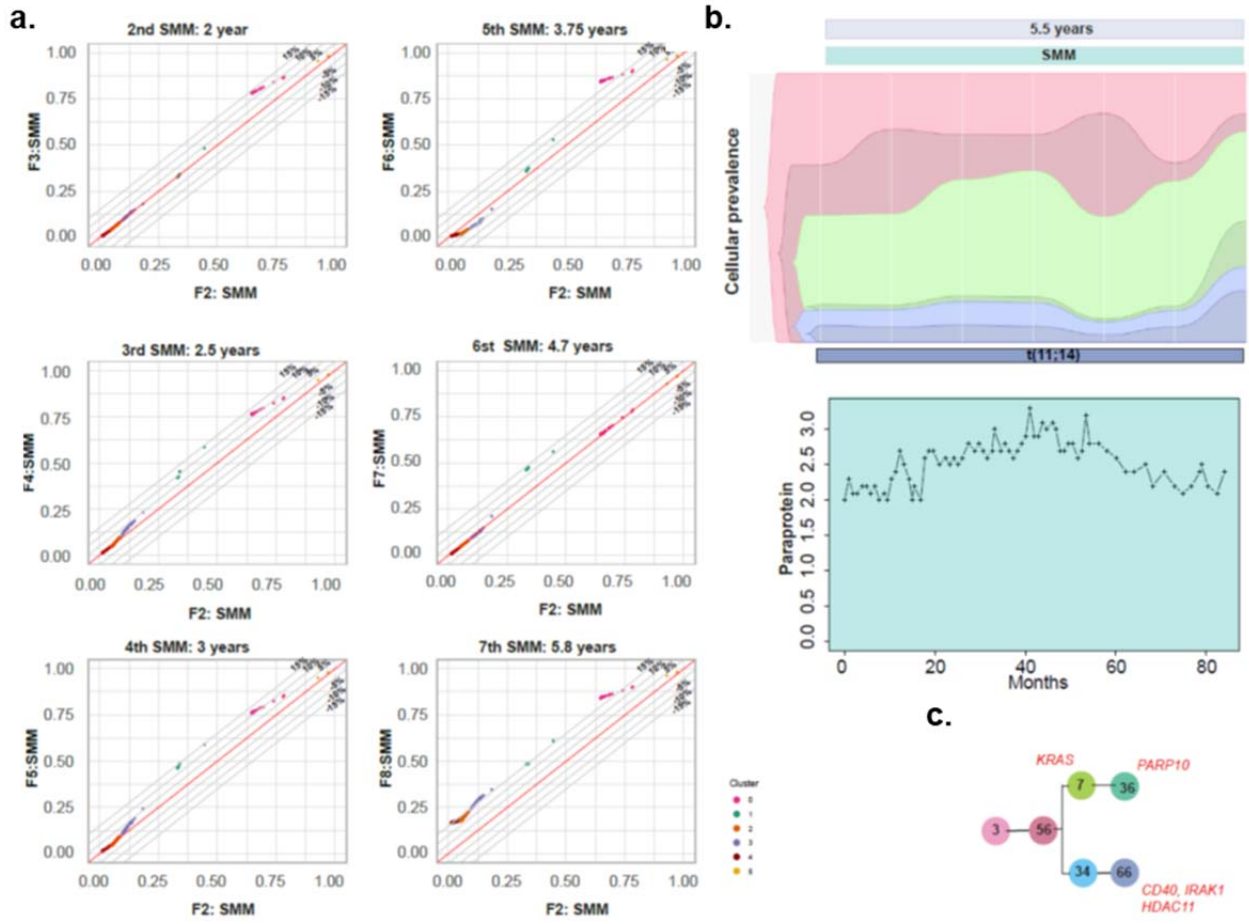

136

137

138 **Supplemental Figure 14: Genomic evolution of Patient G.** A. CCF plot showing the  
 139 emergence of a *TNSFR1B* clone. B. Fishplot summarizing the clonal evolution in  
 140 parallel to the paraprotein evolution. C. Phylogeny tree showing branching evolution  
 141  
 142

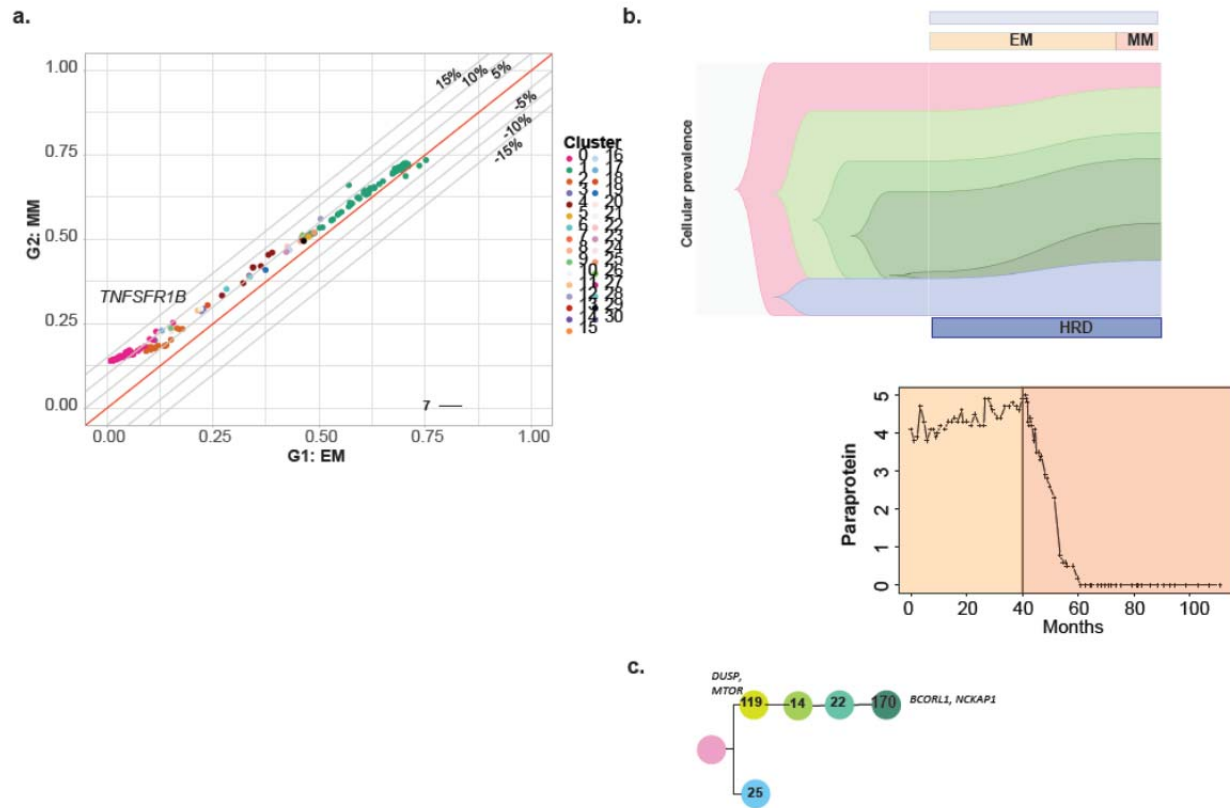

143

144

145 **Supplemental Figure 15: Genomic evolution of Patient B.** A. CCF plot showing the  
 146 emergence of *ZFP36L1* clone. B. Fishplot summarising the clonal evolution in parallel to  
 147 the paraprotein evolution. C. Phylogeny tree showing branching evolution  
 148

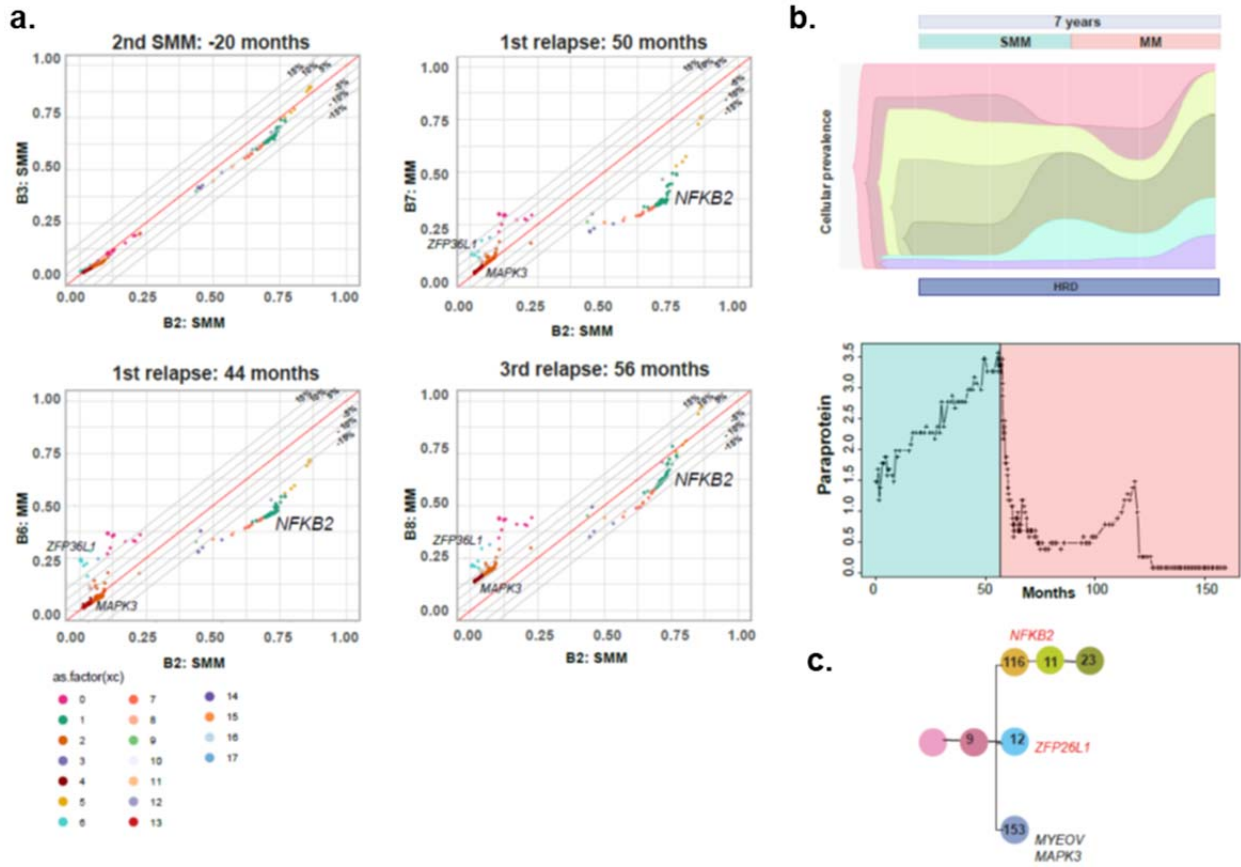

149

150

151 **Supplemental Figure 16: Shannon diversity indices overtime.** There was no linear  
 152 correlation with time but patients that progressed had a stable H index whereas those  
 153 that did not seemed to present changes in H index (a). Patients that progressed had  
 154 significantly higher H indices than those that did not (b). There was no difference in H  
 155 index between patients that had a *KRAS* mutation and those that did not (c). There  
 156 was no difference in the H index of patients with a t(4;14) and gain(1q) in  
 157 comparison to those that did not (d) and there was no difference in H index  
 158 between patients with either a t(4;14), gain(1q) or *KRAS* mutation in comparison  
 159 to those that did not have any of these high risk features (e). Error bands 95% CI,  
 160 n=number of patients, s=number of samples, Boxplot representing second quartile,  
 161 median, and third quartile, whiskers representing first and last quartile, two-sided *p*-  
 162 value derived from Kruskal-Wallis test  
 163

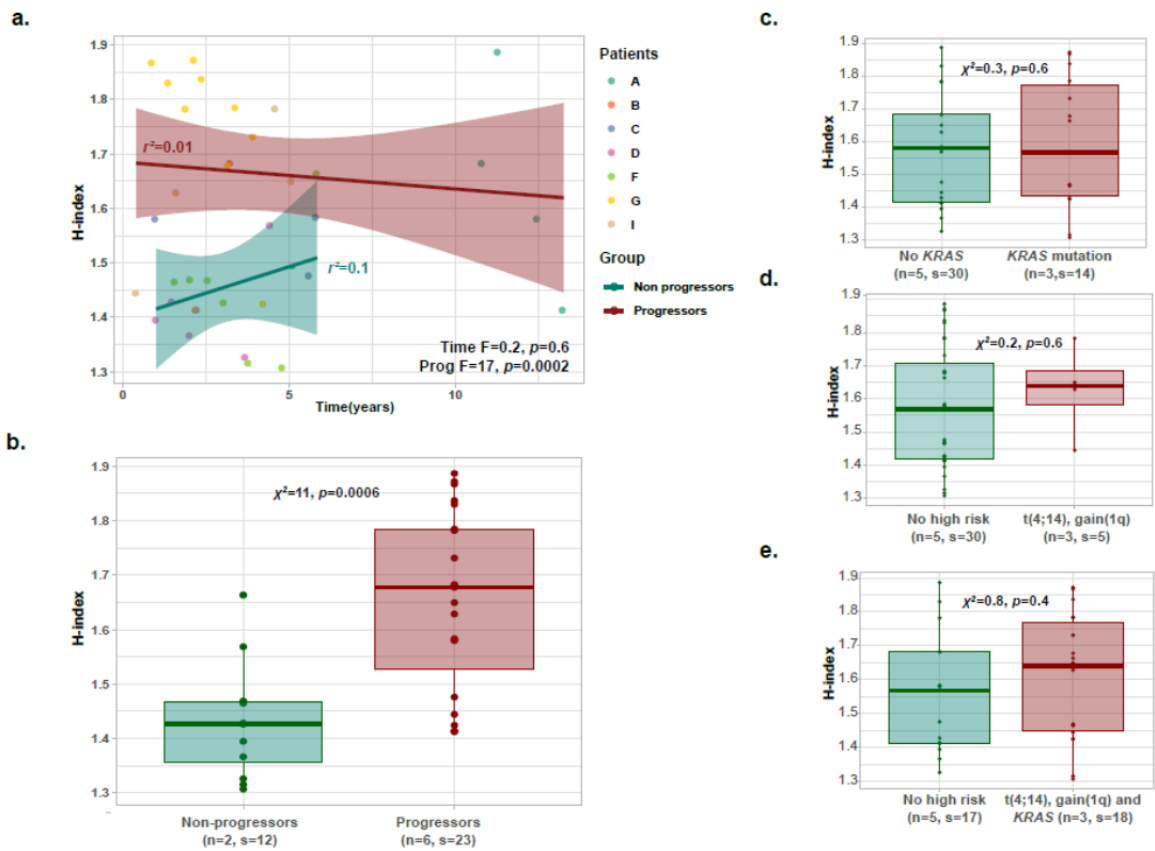

164

165
